# Supplementary material for: The Extracellular Matrix Influences Ovarian Carcinoma Cells’ Sensitivity to Cisplatinum: A First Step towards Personalized Medicine
Source: PubMed Central journal article supplement (PMC7281165; doi:10.3390/cancers12051175), 2020-05-07
Supplement: cancers-12-01175-s001.pdf [file cancers-12-01175-s001.pdf]

## Supplementary Materials

# The Extracellular Matrix Influences Ovarian Carcinoma Cells' Sensitivity to Cisplatin: A First Step towards Personalized Medicine

Andrea Balducci, Chiara Agostinis, Alessandro Mangogna, Veronica Maggi, Gabriella Zito, Federico Romano, Andrea Romano, Rita Ceccherini, Gabriele Grassi, Serena Bonin, Deborah Bonazza, Fabrizio Zanconati, Giuseppe Ricci and Roberta Bulla

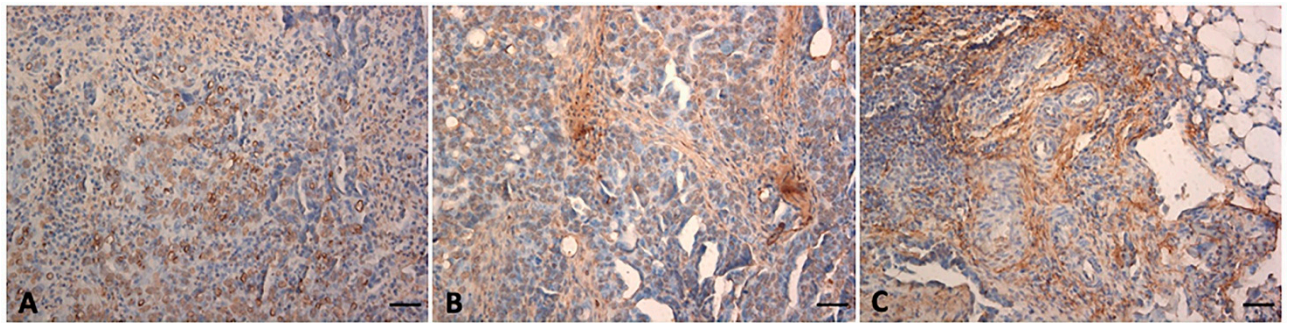

**Figure S1.** FN distribution around blood vessels in HGSOC tumor microenvironment. Magnification 200 $\times$ , scale bar 50  $\mu\text{m}$ .

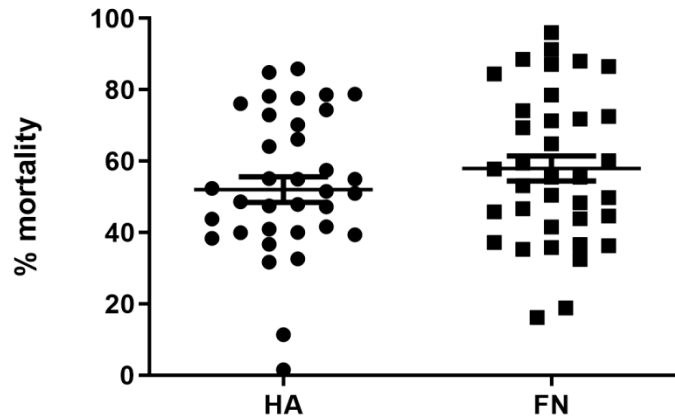

**Figure S2.** Effect of HA and FN matrixes on cisplatin sensitivity of a mixed population of ovarian malignancies and benign tumors. In this graph, mortality after 5  $\mu\text{g/mL}$  cisplatin treatment was reported, by comparing HA and FN.

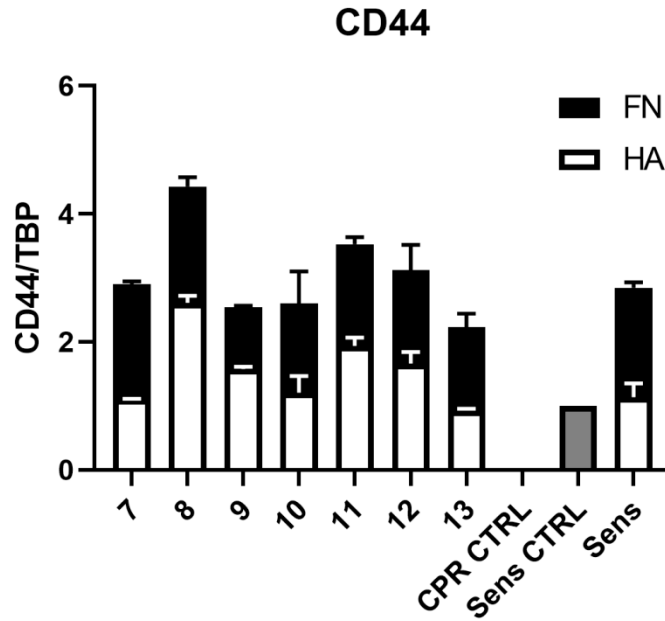

**Figure S3.** CD44 mRNA expression levels in ovarian cancer cells isolated from ascitic fluids. Cells were seeded onto HA and FN matrixes for 24 h. Total RNA was extracted from cell lysates and quantitative Real-Time PCR was performed to evaluate gene expression of CD44- TATA-box binding protein (TBP) was used as a housekeeping gene to normalize gene expression results. Sens TYK-nu were used as a calibrator.

**Table S1.** Immune-phenotypic characterization of the tumor mass. Notes: np = not present; PAX = paxillin; CK =cytokeratin; WT1 = Wilms' tumor 1; ER = estrogen receptor.

| Patient Code | ki67 (%) | p53 | PAX8 | CK7 | CK20 | GATA3 | WT1 | ER  |
|--------------|----------|-----|------|-----|------|-------|-----|-----|
| 1            | np       | np  | np   | np  | np   | np    | np  | np  |
| 2            | np       | -   | +    | np  | np   | np    | np  | np  |
| 3            | 60       | ++  | +    | +   | -    | -     | -   | +   |
| 4            | np       | ++  | +    | +   | -    | -     | -   | np  |
| 5            | np       | ++  | ++   | ++  | -    | -     | ++  | np  |
| 6            | np       | np  | +    | +   | np   | np    | np  | -   |
| 7            | 70       | ++  | +    | +   | -    | -     | +   | np  |
| 8            | 50       | ++  | +    | np  | np   | -     | np  | +   |
| 9            | np       | np  | np   | np  | np   | np    | np  | np  |
| 10           | 60-70    | +++ | ++   | +++ | -    | -     | +   | +++ |
| 11           | np       | +++ | +    | +   | -    | -     | +   | +++ |
| 12           | np       | -   | +    | +   | np   | np    | +   | np  |
| 13           | np       | ++  | +    | +   | -    | -     | +   | ++  |

**Table S2.** Primers used for quantitative Real-Time PCR.

| Gene  | Sequence (5' → 3')      | Tm (°C) | NCBI GeneID |
|-------|-------------------------|---------|-------------|
| MSH2  | AGGCATCCAAGGAGAATGATTG  | 60      | 4436        |
|       | GGAATCCACATACCCAACTCCAA |         |             |
| ERCC1 | TTTGGCGACGTAATCCCGAC    | 61      | 2067        |
|       | CCTGCTGGGGATCTTTCACA    |         |             |
| OGG1  | ACTCCCACTTCCAAGAGGTG    | 60      | 4968        |
|       | GGATGAGCCGAGGTCCAAAAG   |         |             |

|              |                                                    |    |            |
|--------------|----------------------------------------------------|----|------------|
| <b>PMS2</b>  | CAATGGATGTGGGGTAGAAGAAG<br>GTTAGGTCGGCAAACCTTTGAAT | 60 | 5395       |
| <b>XRCC3</b> | CCCCATTCCGCTGTGAATTTG<br>GGTTAGCCCAGGTTATGCCA      | 61 | 7517       |
| <b>CD44</b>  | CTGCCGCTTTGCAGGTGTA<br>CATTGTGGGCAAGGTGCTATT       | 60 | 960        |
| <b>TBP</b>   | GAGCCAAGAGTGAAGAACAGTC<br>GCTCCCCACCATATTCTGAATCT  | 60 | CR456776.1 |

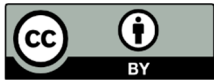

© 2020 by the authors. Licensee MDPI, Basel, Switzerland. This article is an open access article distributed under the terms and conditions of the Creative Commons Attribution (CC BY) license (<http://creativecommons.org/licenses/by/4.0/>).
